# Supplementary material
Source: PubMed Central journal article supplement (PMC3105149)
Supplement: 10_155_Zhang_Suppl.pdf [file 10_155_Zhang_Suppl.pdf]

## **Mammal Cells Double Their Total RNAs against Diabetes, Ischemia**

### **Reperfusion and Malaria-Induced Oxidative Stress**

Zhong-Wei Zhang,<sup>1,2</sup> Jian Cheng,<sup>1,2</sup> Fei Xu,<sup>1</sup> Ming Yuan,<sup>1,3</sup> Jun-Bo Du,<sup>1</sup> Jing Shang,<sup>1</sup> Yong Wang,<sup>2</sup> Lei Du,<sup>4</sup> Zi-Lin Li,<sup>5</sup> and Shu Yuan<sup>1,2</sup>

<sup>1</sup>Ministry of Education Key Laboratory for Bio-Resource and Eco-Environment, College of Life Science, Sichuan University, Chengdu 610064, China

<sup>2</sup>Provincial Key Laboratory for Tibetan Animal Genetic Resources Conservation and Utilization, College of Life Science and Technology, Southwest University for Nationalities, Chengdu 610041, China

<sup>3</sup>College of Biology and Science, Sichuan Agriculture University, Ya'an 625014, China

<sup>4</sup>College of Veterinary Medicine, Sichuan Agriculture University, Ya'an 625014, China

<sup>5</sup>Center of Cardiovascular Surgery, Xijing Hospital, Fourth Military Medical University, Xi'an 710033, China

### **Supplemental material**

**Table SM-1.** List of primers for characterizing human genes.

| Gene                       | Location (map) | L primer               | R primer               |
|----------------------------|----------------|------------------------|------------------------|
| <i>Actin1</i>              | NM_001100      | CCTGACCCTGAAGTACCCTA   | GTGATGACCCTGCCCCGTCT   |
| <i>UBC</i>                 | NM_021009      | CAAAGATCCAGGACAAGG     | TCTAAGACGGAGCACCAG     |
| <i>Hxk1</i> Line 1         | NM_000188      | TGGAGTCCGAGGTTTATG     | GATGCAGGAGACAATGTGA    |
| <i>Hxk1-Anti</i> Line 1    | NM_000188      | TGCTCACCCGAGGGAAGT     | TCAATAGGAATGGCGTAGA    |
| <i>Hxk1</i> Line 2         | NM_000188      | GCTCACCCGAGGGAAGTA     | TCTGCTGGCAGGGAAATG     |
| <i>Hxk1-Anti</i> Line 2    | NM_000188      | TCAGTCCAGCACGTTTGC     | GAGCCAGGGTCTCCTCTAT    |
| <i>Hxk2</i> Line 1         | NM_000189      | ATGGACCAAGGGATTCAA     | TCTGTGCGGAAGTCATCTAG   |
| <i>Hxk2-Anti</i> Line 1    | NM_000189      | CCCGCCAGAAGACATTAG     | AACCACATCCAGGTCAAAC    |
| <i>Hxk2</i> Line 2         | NM_000189      | GTGGTGGACAGGATACGA     | CTGACTGCCCTAAGAATAAA   |
| <i>Hxk2-Anti</i> Line 2    | NM_000189      | CTGGACAGCGATAGAACC     | ATGGAATACTGCCAAGAAA    |
| <i>Hxk3</i> Line 1         | NM_002115      | ACATGGCACTGAGCAAGGA    | ACATGGGAAGGAGAAGGTAAA  |
| <i>Hxk3-Anti</i> Line 1    | NM_002115      | GGGGCTTCGGATGTTGAG     | CCACAGTCTCGGGAATGGA    |
| <i>Hxk3</i> Line 2         | NM_002115      | TGTGAGGTTGGGCTAGTTGT   | CTGCGAGTGATGGCTTCC     |
| <i>Hxk3-Anti</i> Line 2    | NM_002115      | CTTCGGATGTTGAGCTTGTG   | CGCAGTCTGATGCCCTTGA    |
| <i>TBP</i>                 | NM_003194      | CTGCCACCTTACGCTCAG     | CCTTTAGAATAGGGTAGATGTT |
| <i>TBP-Anti</i>            | NM_003194      | CACTCCACTGTATCCCTCC    | CTCTGGCTCATAACTACTAAAT |
| <i>TFIIA-1</i>             | NM_015859      | ATACAAACACCGTGCCTAA    | TTCTTCCACCTGCCCATC     |
| <i>TFIIA-2</i>             | NM_004492      | AGAGGGTCAGGAACAGAG     | TACCATCACAGGCTACAA     |
| <i>TFIIB</i>               | NM_001514      | TCGGAGAACAATGAGCAG     | ACATCAGCAACACCAGCA     |
| <i>TFII-I</i>              | NM_032999      | AGGGCAATGAAGGCACAG     | CCAGGAGGCAAGTAGGAA     |
| <i>CBP (CREBBP)</i>        | NM_004380      | GTCTGCCTTCTCCTACCTCA   | GCCTCCGTAACATTTCTCG    |
| <i>P300</i>                | NM_001429      | GGAGGCACCTTACCCTCAG    | GGGCAGTCAGAGCCATAC     |
| <i>PRDX1</i>               | NM_002574      | TGGTGTCGGTGGTTAGTT     | CCCAGTCCTCCTTGTTC      |
| <i>SOD</i>                 | NM_000454      | GCTGGTTTTCGTCGTAGT     | CTTCATTTCCACCTTTGC     |
| <i>CAT</i>                 | NM_001752      | GTTGAAGATGCGGCGAGAC    | GGGCAGAAGGCTGTTGTT     |
| <i>GPX</i>                 | NM_000581      | CAACCAGTTTGGGCATCAG    | CCGTTCACCTCGCACTTC     |
| <i>chr6.trna160-AlaAGC</i> | Chromosome 6   | GGGGAATTGGCTCAAGCG     | GCGTCGATCCTGCTACCT     |
| <i>chr1.trna113-AsnGTT</i> | Chromosome 1   | CTGTGGCGCAATCGGTTA     | TGGGCTCGAACCCTAAC      |
| <i>chr7.trna19-CysGCA</i>  | Chromosome 7   | GGGGGTATAGCTCACAGG     | AGGGAGTAACCGGATTTG     |
| <i>chr6.trna88-PheGAA</i>  | Chromosome 6   | GCCAAAATAGCTCAGCTG     | TTCTGAAACCCAGGATCA     |
| <i>5S rRNA</i>             | NR_023363      | CTACGGCCATACCACCCT     | GGTATTCCCAGGCGGTCT     |
| <i>5.8S rRNA</i>           | NR_003285      | CTTAGCGGTGGATCACTCG    | AAGCGACGCTCAGACAGG     |
| <i>28S rRNA</i>            | NR_003287      | TTCGGGATAAGGATTGGCTCTA | GGCTGTGGTTTCGCTGGAT    |
| <i>18S rRNA</i>            | NR_003286      | TCCTTTGGTCGCTCGCTCCT   | TCGCTCTGGTCCGTCTTGC    |

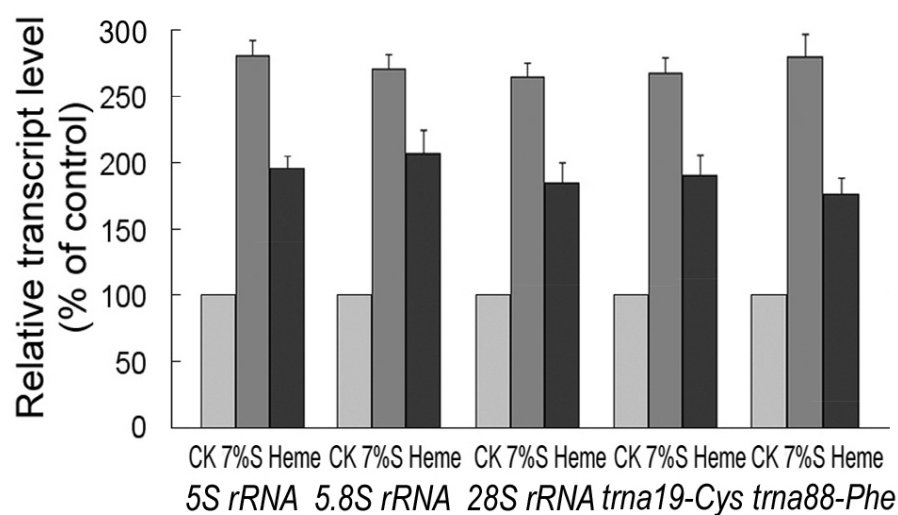

**Figure SM-1.** Effects of 7% glucose (7%S) and 50  $\mu$ M heme treatments (24 h) on 5S rRNA, 5.8S rRNA and 28S rRNA (three representative rRNAs), and trna19-Cys and trna88-Phe (two representative tRNAs) expression. Gene expressing detection was derived on an equal DNA basis. Error bars show standard deviations ( $n=3$ ).

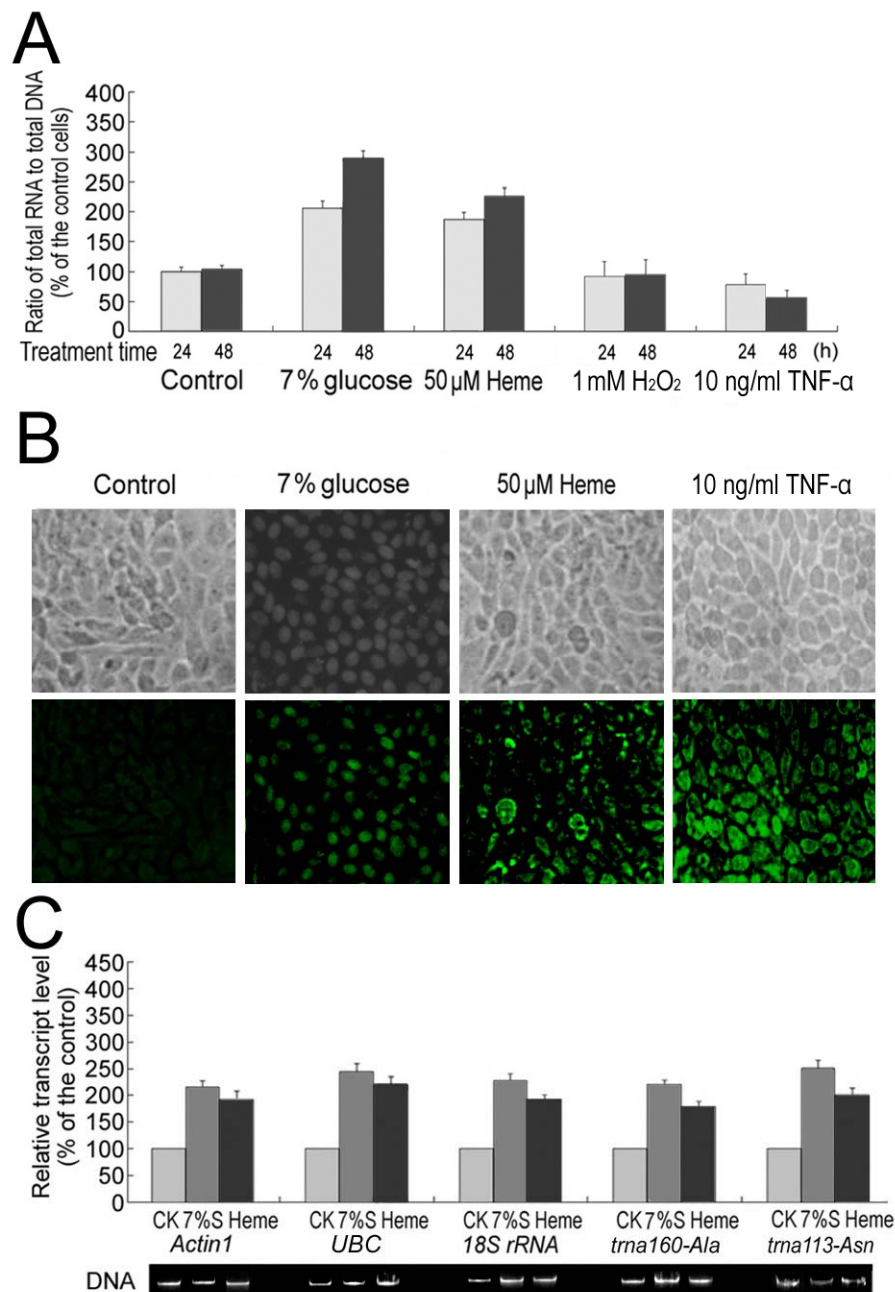

**Figure SM-2.** Glucose and heme induce RNA amplification in Chang liver cells. (A) 7% glucose or 50  $\mu$ M heme but not 1 mM  $H_2O_2$  or 10 ng/ml  $TNF-\alpha$  doubles Chang liver cell total RNAs within 24 h. (B) Cell forms (upper panel) and  $H_2O_2$  levels (lower panel) of heme, glucose or  $TNF-\alpha$ -treated cells (24 h).  $H_2O_2$  was visualized by CM-DCFH-DA stain and observed with a fluorescence microscopy. (C) Effects of 7% glucose (7%S) and 50  $\mu$ M heme treatments (24 h) on *Actin1* and *UBC* (two representative mRNA), *trna160-Ala* and *trna113-Asn* (two representative tRNAs) and *18S rRNA* expression. Gene expressing detection was derived on an equal DNA basis. Error bars show standard deviations ( $n=3$ ).

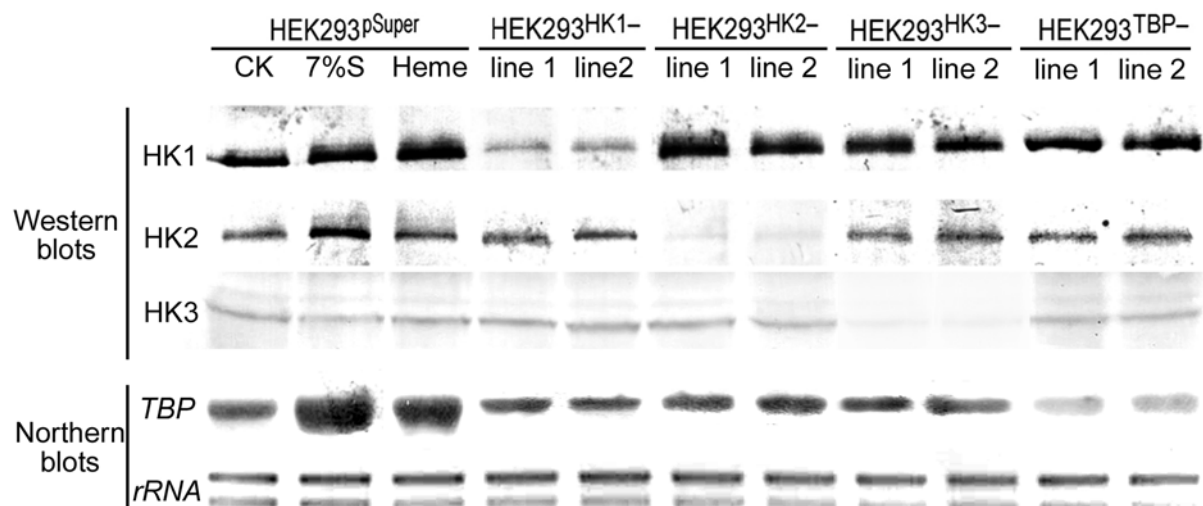

**Figure SM-3.** (C) Effects of 7% glucose (7%S) and 50  $\mu$ M heme on HK1, HK2, HK3 protein levels and *TBP* gene expression. Hexokinase protein levels were detected by Western blotting. *TBP* expression was detected by Northern blotting. SYBR green I-stained *rRNA* is shown as a loading control. Two independent gene-silenced cell lines for each gene were tested. Error bars show standard deviations ( $n=3$ ).

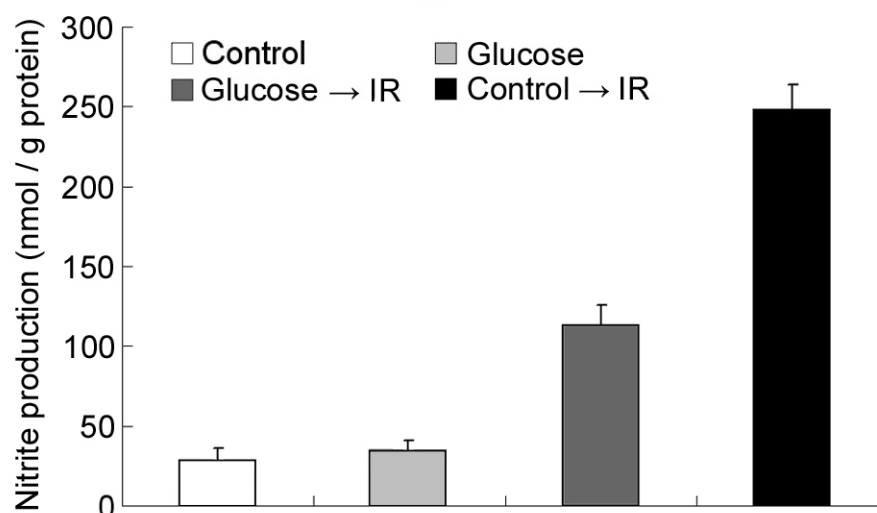

**Figure SM-4.** Effect of glucose infusion and ischemia-reperfusion on NO production. The rat kidneys were treated with or without 30% glucose (renal arterial infusion), and then IR was performed. Kidney samples were taken at 24 h after the glucose infusion or 24 h after reperfusion. Error bars show standard deviations ( $n = 3$ ).

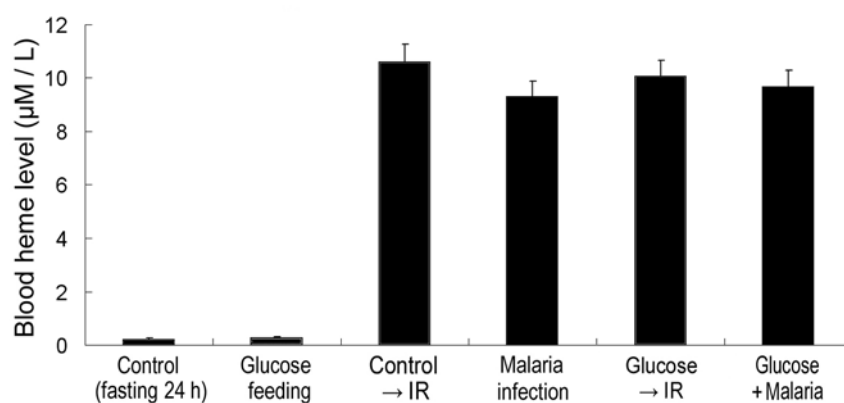

**Fig. SM-5.** Blood free heme levels after glucose feeding (to diabetic rats), ischemia reperfusion (IR) and malaria infection. The rat (fasted for 24 h for the “Control” sample to diabetic experiments) kidneys were treated with or without 30% glucose (once for IR experiments; every two days accompanying with malaria infection), and then 30% glucose solution was administered orally (to diabetic animals, every 8 hours, three times total), or IR or malaria infection (to normal animals) was performed. Blood samples were taken at 24 h after the first glucose administration or 24 h after reperfusion, or 8 days after malaria infection. Error bars show standard deviations ( $n = 3$ ).

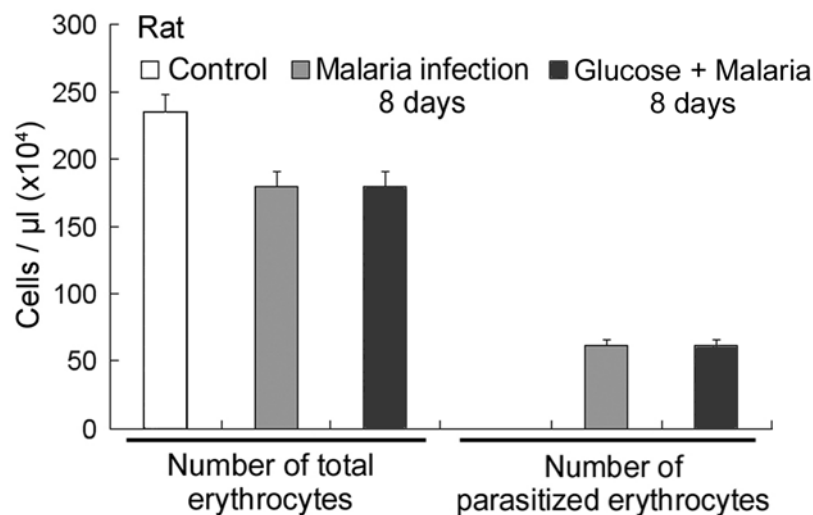

**Figure SM-6.** Severity of malaria infection to rats. Malaria infection was applied with  $10^6$  *Plasmodium berghei* to normal rats. 8 days later, the number of erythrocytes/ $\mu\text{l}$  renal blood ( $\times 10^4$ ) and the number of parasitized erythrocytes/ $\mu\text{l}$  renal blood ( $\times 10^4$ ) were examined by a microscopy. Error bars show standard deviations ( $n = 3$ ). For alleviating malaria infection, rat kidneys were treated with 30% glucose solution (renal arterial infusion, every two days, four times total) paralleling with *Plasmodium berghei* infection for 8 days.

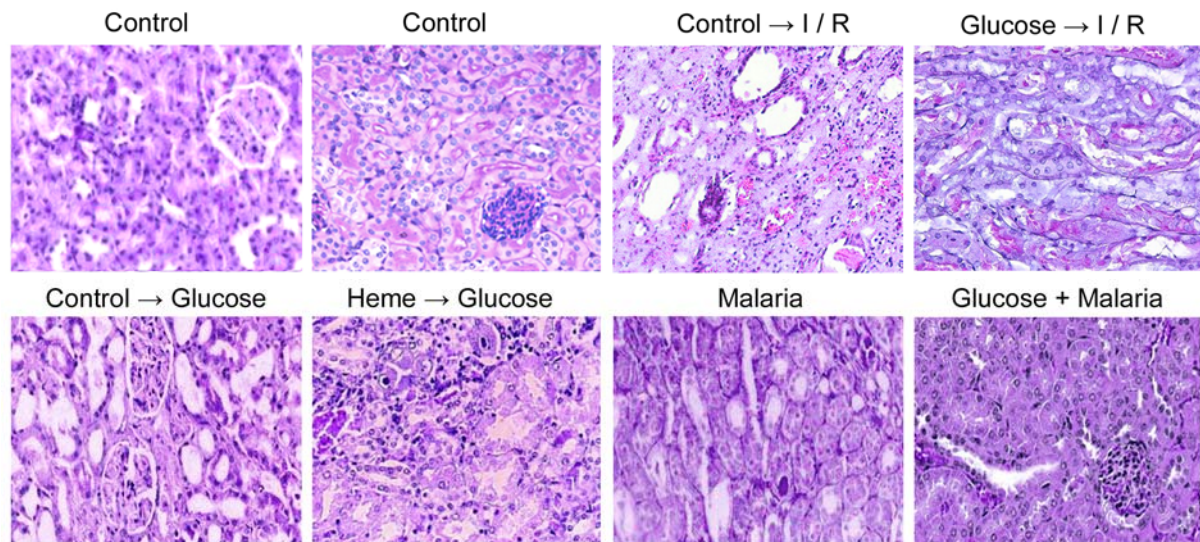

**Figure SM-7.** Subcortical histological sections of kidneys stained with periodic acid-schiff from groups studied as stated. Tubular dilation and loss of brush border occur and flattened epithelial cells are found when the rats were subjected to diabetes, ischemia reperfusion (I/R) or malaria infection. See the legend of Fig. 5 and “Material and Methods” for details.

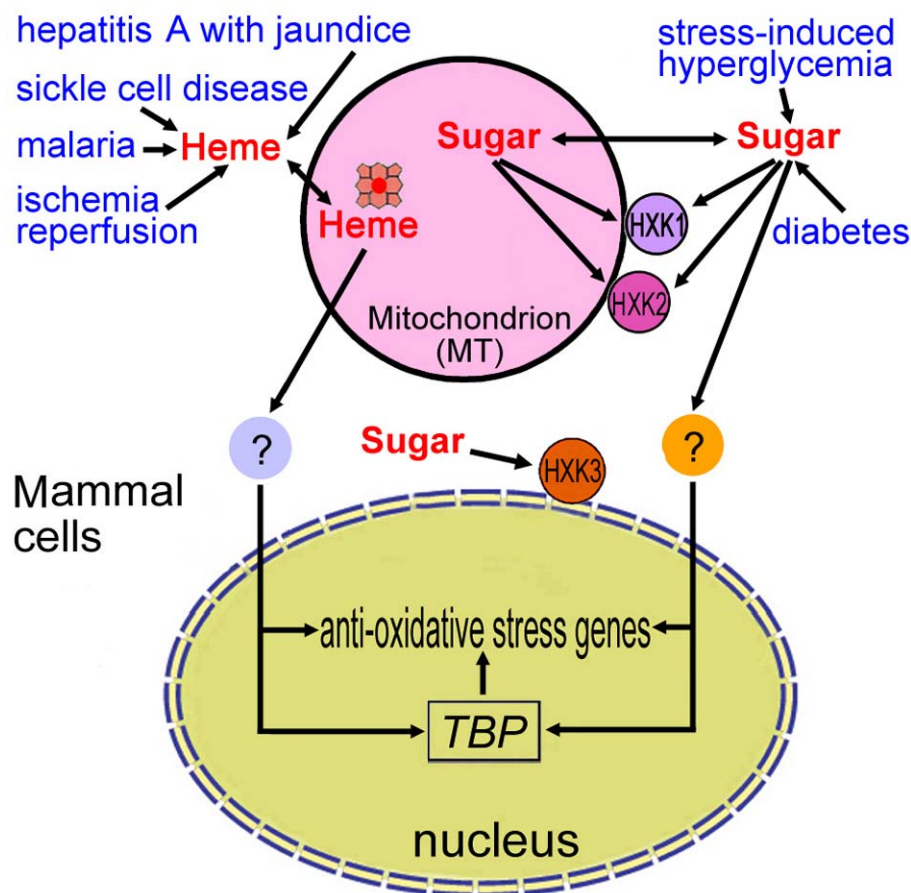

**Figure SM-8.** Model of heme and sugar signals regulating cellular total RNAs and oxidative stress resistance. For mammal cells, stress-induced hyperglycaemia (such as head injury or acute stroke) and diabetes increased blood glucose substantially, and the subsequent ROS. Sickle cell disease, ischemia reperfusion, icterohepatitis and malaria results in high levels of free heme, also causing undesirably oxidative stress. Under these two circumstances, *TBP* (encoding the TATA box-binding protein) transcript is promoted, and subsequently cellular total RNAs are increased. Anti-oxidative stress gene expression is also promoted simultaneously. Hexokinase does not mediate sugar signaling in mammal cells. However, sugars generate ROS in mammal cells depending on mitochondrial-bound hexokinase 1 and 2. Human hexokinase 3 has a perinuclear localization.
